# Supplementary material
Source: PubMed Central journal article supplement (PMC6702637)

SUPPLEMENTARY DATA

**Supplementary Figure S1:**

A; Differentiated 3T3-L1 adipocytes were treated with or without 1 ng/ml TNF $\alpha$  for 18 hr, followed by a 4 hr forskolin stimulation. Full length and cleaved caspase 3 levels were determined immunochemically. B; Differentiated 3T3-L1 adipocytes were treated with vehicle or 20  $\mu$ M FSK and the secretion of FABP4 evaluated immunochemically as a function of time. C; Differentiated 3T3-L1 adipocytes were treated with vehicle or 20  $\mu$ M FSK for 4 hr and secreted FABP4, FABP5, eNAMPT, Galectin-3 and RBP4 levels evaluated immunochemically. D; Differentiated 3T3-L1 adipocytes were treated with or without the ATGL inhibitor, ASTAT, for 2 hr followed by addition of either vehicle or 20  $\mu$ M FSK for 4 hr. The level of secreted FABP4 was evaluated immunochemically. E; Quantitative analysis of the levels of secreted FABP4 (from panel D) and FFA. F; Western analysis of secreted FABP4 and eNAMPT from differentiated 3T3-L1 adipocytes in normoxia or hypoxia for 16 hours.

Supplementary Figure 1

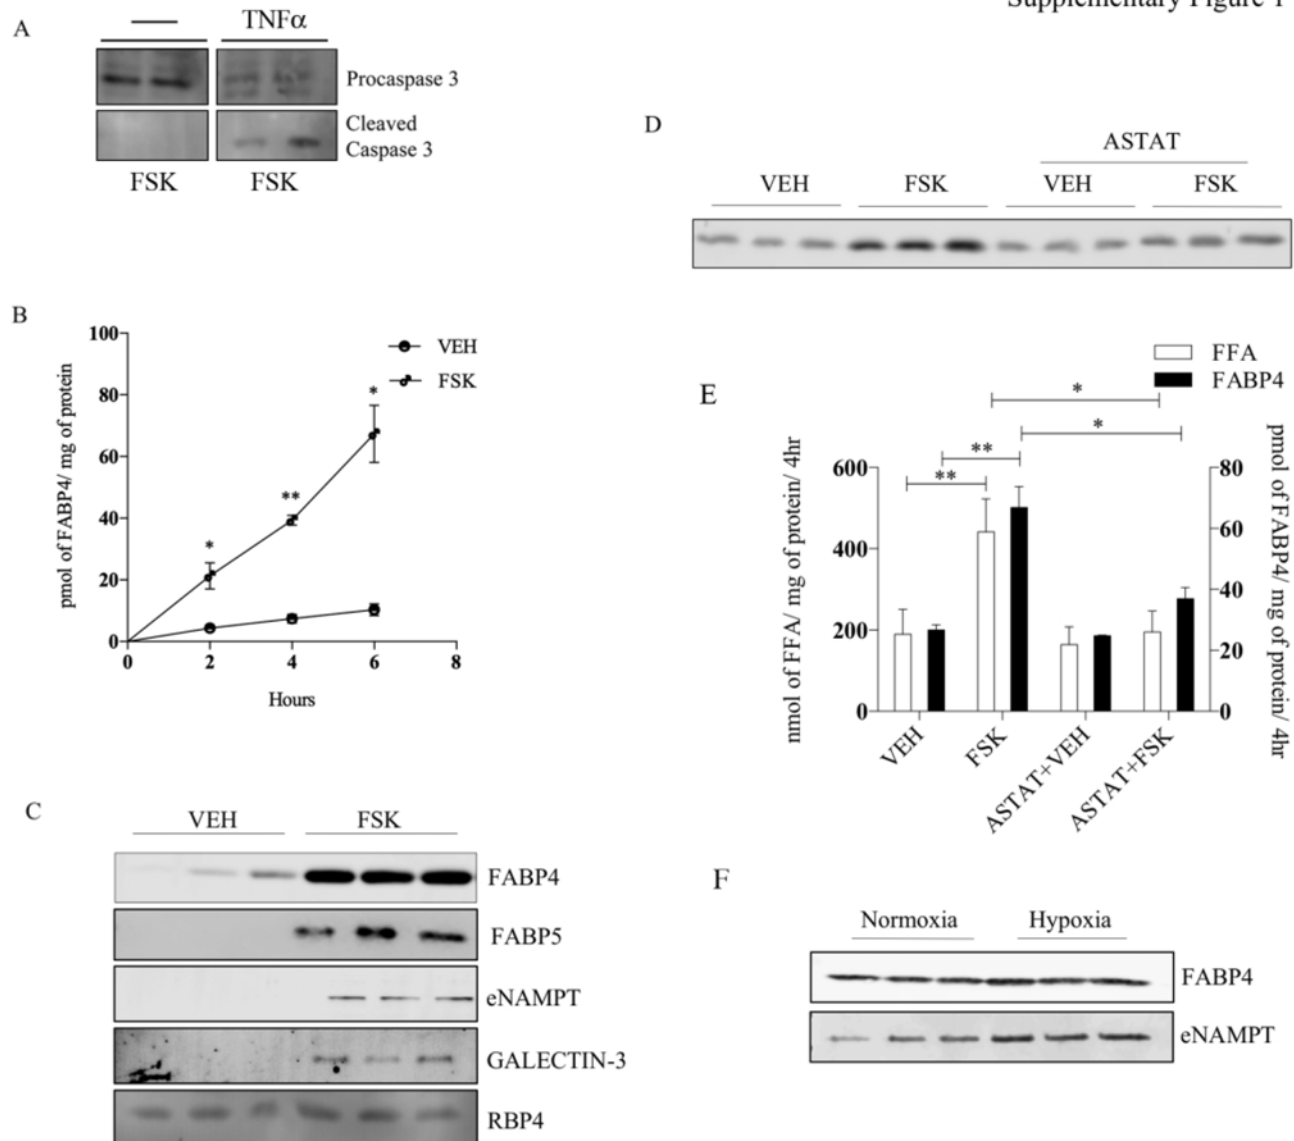

Supplement: DB181367SupplementaryData.pdf [file DB181367SupplementaryData.pdf]
